# Supplementary material
Source: publisher site journal article supplement (https://www.dovepress.com/article/567370)
Supplement: Supplementary file 1 [file 567370%20Supplementary%20file.docx]

**Supplementary Material**

Supplementary Table 1: Area-level social determinants of health (SDOH)

|  | **Medicare Advantage** | **Fee-for-service** |
| --- | --- | --- |
| Number of patients with any SDOH data available, N (%) | 525 (100%) | 3,180 (100%) |
| **Quartiles of SES Index Scorea, n (%)** |  |  |
| Number of patients with non-missing SES index data, n (%) | 523 (99.6%) | 3,159 (99.3%) |
| 1 (lowest) | 170 (32.5%) | 883 (28.0%) |
| 2 | 129 (24.7%) | 768 (24.3%) |
| 3 | 125 (23.9%) | 723 (22.9%) |
| 4 (highest) | 99 (18.9%) | 785 (24.9%) |
| **Economic Stability** |  |  |
| Proportion of population that is unemployed, mean (SD) | 6.6 (3.4) | 6.1 (3.3) |
| Proportion of population with income below the poverty line, mean (SD) | 17.2 (9.9) | 15.6 (8.9) |
| Median household income in the prior 12-month period, in USD, mean (SD) | 57,340 (22,942) | 61,943 (24,968) |
| Median household income, standardized to range from 0 to 100, mean (SD) | 41.1 (24.6) | 47.0 (26.7) |
| **Education Access and Qualityb** |  |  |
| Proportion of population aged ≥25 year-old who have less than high school degree, mean (SD) | 12.1 (6.6) | 12.7 (7.9) |
| Proportion of population aged ≥25 year-old who have at least 4 years of college, mean (SD) | 27.6 (14.7) | 29.2 (16.2) |
| Proportion of population who speak English less than “well”, mean (SD) | 1.9 (3.0) | 2.6 (3.5) |
| Proportion of employed persons aged >= 16 years who are in white collar occupations, mean (SD) | 10 (3.9) | 10.7 (5.2) |
| **Neighborhood and Built Environment** |  |  |
| Median home value among owner-occupied housing units, standardized to range from 0 to 100, mean (SD) | 43.1 (21.0) | 45.6 (24.5) |
| Percentage of households with more than 1 person per room, mean (SD) | 2.4 (2.7) | 3.5 (3.9) |

USD, United States Dollar; SD, standard deviation; SES, socioeconomic status.

aThe SES index is a composite SDOH measure based on seven factors (unemployment rate, poverty rate, median household income, median home value, proportion of not having high school degree, proportion with college degree, proportion of households that average one or more persons per room). The SES index score is reported in quartiles, with “4” indicating a patient is in the top 25% of the SES index score and “1” indicating a patient is in the bottom 25% of the SES index score, using thresholds based on the US national population distribution.

bData are from the 2020 American Community Survey via AHRQ, reported at the Census tract level (based on zip code). The percentages displayed represent the mean distribution of these variables in the communities in which individuals resided.

Supplementary Table 2: Schizophrenia type from ICD-10-CM codes on medical claims, during baseline (including index date)

|  | **Medicare Advantage** | **Fee-for-service** |
| --- | --- | --- |
| Number of patients, n (%)a | 525 | 3,180 |
| Catatonic (F20.2) | <11 | <11 |
| Disorganized (F20.1) | <11 | 29 (0.9%) |
| Paranoid (F20.0) | 51 (9.7%) | 422 (13.3%) |
| Schizophreniform disorder (F20.81) | <11 | <11 |
| Residual (F20.5) | <11 | <11 |
| Schizoaffective disorder (F25) | 205 (39.0%) | 1,149 (36.1%) |
| Other specified types (F20.89) | <11 | 55 (1.7%) |
| Unspecified types (F20.9) | 112 (21.3%) | 816 (25.7%) |
| Missing | 149 (28.4%) | 715 (22.5%) |

aWith ≥1 claim in any place of service

Supplementary Table 3: Non-pharmacologic treatments during baseline and follow-up

|  | **Medicare Advantage** | | **Fee-for-service** | |
| --- | --- | --- | --- | --- |
| **HCRU** | **Baseline** | **Follow-up** | **Baseline** | **Follow-up** |
| Number of patients, N | 525 | 525 | 3,180 | 3,180 |
| **Any non-pharmacologic treatment** |  |  |  |  |
| ≥1 visit, n (%) | 329 (62.7%) | 281 (53.5%) | 1920 (60.4) | 1800 (56.6) |
| Number of visits, mean (SD) | 4.3 (9.23) | 5.7 (13.46) | 5.12 (11.77) | 5.37 (12.16) |
| **Individual/family/group psychotherapy** |  |  |  |  |
| ≥1 visit, n (%) | 208 (39.6%) | 216 (41.1%) | 1239 (39.0) | 1264 (39.8) |
| Number of visits, mean (SD) | 3.4 (8.85) | 4.9 (12.62) | 4.01 (11.21) | 4.45 (11.72) |
| **Psychotherapy in crisis visits** |  |  |  |  |
| ≥1 visit, n (%) | 28 (5.3%) | 19 (3.6%) | 79 (2.5) | 68 (2.1) |
| Number of visits, mean (SD) | 0.1 (0.40) | 0.1 (0.31) | 0.04 (0.34) | 0.03 (0.30) |
| **Psychiatric diagnostic evaluation visits** |  |  |  |  |
| ≥1 visit, n (%) | 235 (44.8%) | 168 (32.0%) | 1418 (44.6) | 1200 (37.7) |
| Number of visits, mean (SD) | 0.8 (1.16) | 0.6 (1.26) | 0.97 (1.87) | 0.79 (1.80) |

SD, standard deviation

Supplementary Table 4: Association between baseline characteristics and LAI-AM adherence

|  | **MA Adjusted ORs**  **(95% CI); N=523** | **FFS Adjusted ORs**  **(95% CI); N=3,159** |
| --- | --- | --- |
| **Sex** |  |  |
| Male vs Female | **1.28 (1.03-1.60)** | **1.24 (1.05-1.45)** |
| **Age** |  |  |
| 18-39 vs 65+ | **1.52 (1.02-2.28)** | **1.70 (1.27-2.28)** |
| 40-64 vs 65+ | 1.03 (0.77-1.39) | **1.84 (1.43-2.37)** |
| **Race** |  |  |
| Black/African-American vs White | 0.71 (0.46-1.11) | 1.04 (0.86-1.26) |
| Hispanic vs White | **2.07 (1.05-4.05)** | 1.16 (0.88-1.53) |
| Other vs White | 0.71 (0.41-1.23) | 1.05 (0.75-1.48) |
| **Index LAI antipsychotic type** |  |  |
| Atypical vs Typical | **1.47 (1.09-1.99)** | **1.57 (1.31-1.89)** |
| **Index LAI antipsychotic prescriber** |  |  |
| Psychiatrist vs Non-psychiatrist | 0.96 (0.78-1.19) | **1.19 (1.02-1.39)** |
| **Number of baseline comorbidities** |  |  |
| Chronic medical conditions | 0.99 (0.90-1.09) | 0.99 (0.96-1.03) |
| Behavioral health conditions | **0.84 (0.75-0.94)** | **0.87 (0.84-0.91)** |
| **Baseline use of psychotropic medication** |  |  |
| Antipsychotics (non-LAI) use vs No use | 1.22 (0.89-1.67) | **1.85 (1.39-2.47)** |
| Antidepressant use vs No use | **1.40 (1.09-1.80)** | 1.02 (0.86-1.22) |
| Anxiolytic/sedative/hypnotic use vs No use | **0.78 (0.62-0.99)** | **0.82 (0.68-0.97)** |
| Stimulant use vs No use | 0.73 (0.32-1.66) | 0.82 (0.51-1.31) |

Results are based on two independent logistic regression models (one per cohort). Other characteristics adjusted for in the model included socioeconomic status category, US region of residence, LAI antipsychotic index year, baseline schizophrenia diagnosis, and baseline RX counts (class level). **Bold** indicates statistically significant at the 5% level.

Supplementary Table 5a: Baseline (1 year) and follow-up (1 year) all-cause healthcare resource utilization

|  | **Medicare Advantage** | | **Fee-for-service** | |
| --- | --- | --- | --- | --- |
|  | **Baseline** | **Follow-up** | **Baseline** | **Follow-up** |
| **Number of patients, N** | 525 | 525 | 3,180 | 3,180 |
| **Inpatient hospitalization** |  |  |  |  |
| ≥1 visit, n (%) | 391 (74.5%) | 244 (46.5%) | 1938 (60.9%) | 1339 (42.1%) |
| Number of visits, mean (SD) | 1.9 (2.21) | 1.1 (1.88) | 1.6 (2.25) | 1.1 (2.03) |
| Length of stay among patients with ≥1 visit |  |  |  |  |
| Mean (SD) | 12.4 (11.02) | 10.7 (9.69) | 14.63 (21.41) | 13.98 (24.95) |
| **Emergency department visits** |  |  |  |  |
| ≥1 visit, n (%) | 347 (66.1%) | 286 (54.5%) | 2084 (65.5%) | 1774 (55.8%) |
| Number of visits, mean (SD) | 2.6 (4.64) | 1.9 (3.72) | 2.7 (5.71) | 2.3 (5.49) |
| **Outpatient visits** |  |  |  |  |
| ≥1 visit, n (%) | 509 (97.0%) | 511 (97.3%) | 3149 (99.0%) | 3154 (99.2%) |
| Number of visits, mean (SD) | 32.8 (37.94) | 40.1 (38.11) | 34.1 (29.46) | 34.2 (29.95) |
| median (IQR) | 22 (9-42) | 28 (13-56) | 26 (14-46) | 25 (14-45) |
| **Office visit** |  |  |  |  |
| ≥1 visit, n (%) | 455 (86.7%) | 469 (89.3%) | 2595 (81.6%) | 2624 (82.5%) |
| Number of visits, mean (SD) | 10.3 (11.01) | 11.5 (11.45) | 6.9 (7.85) | 7.9 (8.20) |
| **Office visit with a psychiatrist** |  |  |  |  |
| ≥1 visit, n (%) | 184 (35.0%) | 195 (37.1%) | 1315 (41.4%) | 1312 (41.3%) |
| Number of visits, mean (SD) | 1.4 (3.13) | 2.0 (3.73) | 1.85 (3.31) | 2.32 (4.01) |
| **Office visit with a PCP** |  |  |  |  |
| ≥1 visit, n (%) | 296 (56.4%) | 297 (56.6%) | 1352 (42.5%) | 1297 (40.8%) |
| Number of visits, mean (SD) | 2.6 (4.58) | 2.3 (4.07) | 1.63 (3.06) | 1.58 (3.00) |
| **Telehealth visits** |  |  |  |  |
| ≥1 visit, n (%) | 86 (16.4%) | 187 (35.6%) | 421 (13.2%) | 839 (26.4%) |
| Number of visits, mean (SD) | 0.9 (3.28) | 2.8 (6.44) | 0.50 (1.98) | 1.41 (4.33) |
| **Ambulance transports** |  |  |  |  |
| ≥1 visit, n (%) | 342 (65.1%) | 251 (47.8%) | 1757 (55.3%) | 1366 (43.0%) |
| Number of visits, mean (SD) | 2.2 (3.81) | 1.6 (3.03) | 2.12 (4.31) | 1.79 (4.54) |
| **Prescription drug fills** |  |  |  |  |
| Patients with ≥1 fill, n(%) | 508 (96.8%) | 523 (99.6%) | 3078 (96.8%) | 3171 (99.7%) |
| Number of fills, mean (SD) | 60.4 (58.40) | 72.7 (63.71) | 58.69 (54.13) | 69.59 (57.74) |
| median (IQR) | 45 (19-85) | 56 (27-99) | 44 (18-86) | 56 (27-96) |

IQR, interquartile range; PCP, primary care physician; SD, standard deviation

Supplementary Table 5b: Baseline (1 year) and follow-up (1 year) mental health related healthcare resource utilization

|  | **Medicare Advantage** | | **Fee-for-service** | |
| --- | --- | --- | --- | --- |
|  | **Baseline** | **Follow-up** | **Baseline** | **Follow-up** |
| **Number of patients, N** | 525 | 525 | 3,180 | 3,180 |
| **Inpatient hospitalization** |  |  |  |  |
| ≥1 visit, n (%) | 380 (72.4%) | 238 (45.3%) | 1912 (60.1%) | 1312 (41.3%) |
| Number of visits, mean (SD) | 1.8 (2.14) | 1.1 (1.79) | 1.58 (2.22) | 1.06 (2.01) |
| Length of stay among patients with ≥1 visit |  |  |  |  |
| Mean (SD) | 12.7 (11.09) | 10.8 (9.57) | 14.66 (21.40) | 14.10 (25.20) |
| **Emergency department visits** |  |  |  |  |
| ≥1 visit, n (%) | 289 (55.0%) | 244 (46.5%) | 1774 (55.8%) | 1435 (45.1%) |
| Number of visits, mean (SD) | 1.7 (3.08) | 1.3 (2.54) | 1.94 (4.16) | 1.63 (4.47) |
| **Outpatient visits** |  |  |  |  |
| ≥1 visit, n (%) | 474 (90.3%) | 493 (93.9%) | 3072 (96.6%) | 3070 (96.5%) |
| Number of visits, mean (SD) | 14.3 (26.22) | 18.8 (23.34) | 21.67 (23.22) | 21.57 (23.02) |
| median (IQR) | 8 (3-16) | 12 (5-24) | 15 (7-29) | 15 (7-28) |
| **Office visit** |  |  |  |  |
| ≥1 visit, n (%) | 382 (72.8%) | 416 (79.2%) | 2194 (69.0%) | 2250 (70.8%) |
| Number of visits, mean (SD) | 4.7 (5.81) | 6.0 (6.26) | 3.79 (4.73) | 4.83 (5.48) |
| **Office visit with a psychiatrist** |  |  |  |  |
| ≥1 visit, n (%) | 175 (33.3%) | 188 (35.8%) | 1243 (39.1%) | 1254 (39.4%) |
| Number of visits, mean (SD) | 1.4 (3.12) | 1.9 (3.61) | 1.72 (3.23) | 2.20 (3.90) |
| **Office visit with a PCP** |  |  |  |  |
| ≥1 visit, n (%) | 195 (37.1%) | 204 (38.9%) | 860 (27.0%) | 852 (26.8%) |
| Number of visits, mean (SD) | 1.0 (2.10) | 0.9 (1.99) | 0.66 (1.61) | 0.70 (1.74) |
| **Telehealth visits** |  |  |  |  |
| ≥1 visit, n (%) | 76 (14.5%) | 168 (32.0%) | 367 (11.5%) | 745 (23.4%) |
| Number of visits, mean (SD) | 0.7 (2.76) | 2.2 (5.56) | 0.42 (1.81) | 1.18 (3.94) |
| **Ambulance transports** |  |  |  |  |
| ≥1 visit, n (%) | 310 (59.0%) | 227 (43.2%) | 730 (23.0%) | 520 (16.4%) |
| Number of visits, mean (SD) | 1.6 (2.59) | 1.2 (2.12) | 0.51 (1.56) | 0.40 (1.67) |
| **Prescription drug fills** |  |  |  |  |
| Patients with ≥1 fill, n(%) | 484 (92.2%) | 512 (97.5%) | 2969 (93.4%) | 3147 (99.0%) |
| Number of fills, mean (SD) | 22.2 (19.70) | 29.8 (23.74) | 20.97 (18.90) | 28.01 (20.91) |
| median (IQR) | 17 (6-32) | 25 (13-40) | 16 (7-30) | 24 (13-38) |

IQR, interquartile range; PCP, primary care physician; SD, standard deviation. Mental health-related utilization was based on medical claims with ICD-10-CM codes for schizophrenia and any other behavioral health related conditions; all claims with HCPCS codes for antipsychotic medications; and pharmacy claims for antipsychotic medications.

Supplementary Table 6: Baseline (1 year) and follow-up (1 year) healthcare costs (2022 USD)

|  | **Medicare Advantage** | | **Fee-for-service** | |
| --- | --- | --- | --- | --- |
|  | **Baseline** | **Follow-up** | **Baseline** | **Follow-up** |
| **Mean (SD)**  **[median]** | **Mean (SD)**  **[median]** | **Mean (SD)**  **[median]** | **Mean (SD)**  **[median]** |
| Number of patients, N | 525 | 525 | 3,180 | 3,180 |
| **All-cause costs** |  |  |  |  |
| **Total costs (medical + pharmacy)** | 40,725 (44,457)  [27,882] | 41,404 (36,019)  [33,359] | 37,663 (40,374)  [25,430] | 42,180 (41,335)  [32,714] |
| Patient paid | 3,599 (3,350) | 2,627 (3,119) | 3,283 (6,491) | 2,667 (5,941) |
| Plan paid | 37,126 (42,241) | 38,778 (34,187) | 34,381 (36,231) | 39,512 (37,993) |
| **Total medical costs** | 31,485 (41,479)  [20,373] | 20,682 (29,882)  [7,965] | 30,352 (38,588)  [16,396] | 22,589 (37,779)  [7,716] |
| Patient paid | 3,354 (3,222) | 2,298 (2,984) | 3,163 (6,481) | 2,495 (5,915) |
| Plan paid | 28,131 (39,299) | 18,384 (27,763) | 27,189 (34,189) | 20,095 (33,831) |
| **Inpatient hospitalization** | 24,176 (38,196) | 12,969 (25,013) | 21,959 (32,929) | 14,188 (31,983) |
| Patient paid | 2,206 (2,444) | 1,058 (1,796) | 2,378 (6,152) | 1,642 (5,477) |
| Plan paid | 21,970 (36,563) | 11,911 (23,830) | 19,581 (28,910) | 12,546 (28,557) |
| **Emergency department** | 2,777 (6,250) | 2,033 (4,526) | 1,391 (3,010) | 1,222 (3,075) |
| Patient paid | 390 (741) | 286 (555) | 326 (843) | 278 (842) |
| Plan paid | 2,388 (5,600) | 1,746 (4,046) | 1,065 (2,302) | 944 (2,367) |
| **Outpatient visits** | 4,531 (9,278) | 5,680 (11,253) | 7,002 (9,034) | 7,180 (9,705) |
| Patient paid | 759 (1,668) | 953 (2,042) | 459 (1,278) | 575 (1,522) |
| Plan paid | 3,773 (7,817) | 4,727 (9,351) | 6,543 (8,135) | 6,605 (8,612) |
| **Total pharmacy costs** | 9,241 (14,929)  [3,699] | 20,723 (20,349)  [16,402] | 7,312 (13,403)  [2,462] | 19,590 (19,780)  [15,274] |
| Patient paid | 245 (653) | 329 (823) | 120 (390) | 173 (614) |
| Plan paid | 8,996 (14,811) | 20,393 (20,384) | 7,192 (13,396) | 19,418 (19,811) |
|  |  |  |  |  |
| **Mental health-related costsa** |  |  |  |  |
| **Total costs (medical + pharmacy)** | 26,755 (30,694)  [19,636] | 28,488 (27,725)  [23,914] | 29,855 (36,039)  [18,661] | 33,975 (35,472)  [27,542] |
| Patient paid | 2,306 (2,336) | 1,549 (2,042) | 2,848 (6,191) | 2,298 (5,789) |
| Plan paid | 24,449 (29,172) | 26,939 (26,752) | 27,007 (31,875) | 31,677 (32,039) |
| **Total medical costs** | 23,000 (30,284)  [13,275] | 14,095 (24,803)  [3,778] | 26,029 (35,897)  [12,572] | 18,394 (33,986)  [3,802] |
| Patient paid | 2,203 (2,263) | 1,344 (1,908) | 2,793 (6187) | 2,181 (5,772) |
| Plan paid | 20,797 (28,797) | 12,751 (23,649) | 23,235 (31,652) | 16,212 (30,110) |
| **Inpatient hospitalization** | 19,901 (29,286) | 10,742 (23,449) | 21,250 (32,386) | 13,688 (30,842) |
| Patient paid | 1,778 (2,092) | 827 (1,554) | 2,273 (5,926) | 1,616 (5,474) |
| Plan paid | 18,123 (27,914) | 9,915 (22,518) | 18,977 (28,495) | 12,072 (27,367) |
| **Emergency department** | 1,180 (2,431) | 932 (1,993) | 1,067 (2,491) | 949 (2,618) |
| Patient paid | 152 (280) | 121 (264) | 246 (663) | 209 (597) |
| Plan paid | 1,028 (2,202) | 812 (1,788) | 820 (1924) | 740 (2065) |
| **Outpatient visits** | 1,919 (4,540) | 2,421 (4,666) | 3712 (5,839) | 3,757 (6,430) |
| Patient paid | 272 (570) | 396 (860) | 274 (1031) | 357 (1,273) |
| Plan paid | 1,646 (4,223) | 2,024 (3,929) | 3438 (5,060) | 3,400 (5,438) |
| **Total pharmacy costs** | 3,756 (5,688)  [1,278] | 14,393 (13,180)  [10,328] | 3,826 (7647)  [815] | 15,581 (15,145)  [10,988] |
| Patient paid | 104 (316) | 205 (609) | 55 (261) | 117 (513) |
| Plan paid | 3,652 (5,659) | 14,188 (13,196) | 3772 (7,625) | 15,464 (15,160) |

SD = standard deviation

aMental health-related costs were based on medical claims with ICD-10-CM codes for schizophrenia and any other behavioral health related conditions; all claims with HCPCS codes for antipsychotic medications; and pharmacy claims for antipsychotic medications.

Supplementary Figure 1: Cohort identification


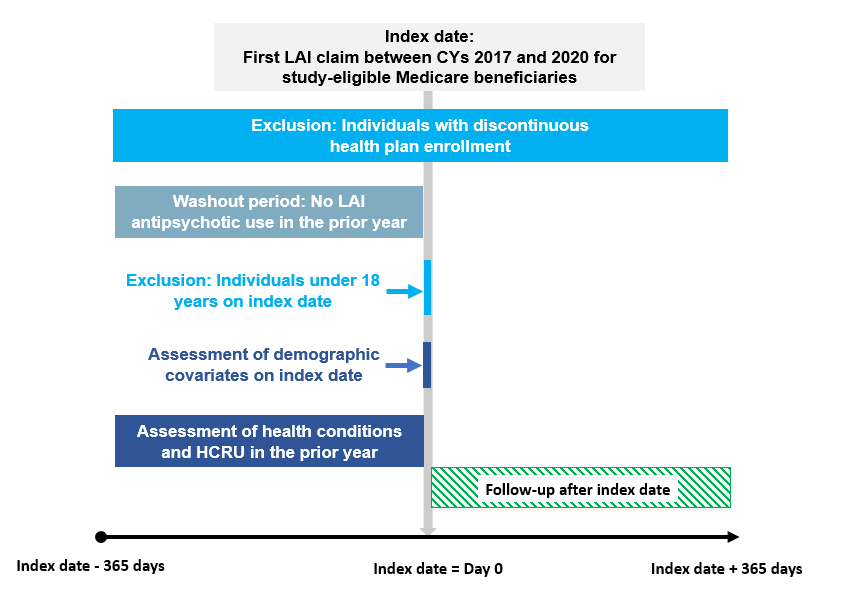


- No exclusions were made based on presence/absence of diagnoses, state of residence, or Medicare eligibility reason.
- The 7 FDA-approved LAI-AMs at the time of this study include fluphenazine decanoate (Prolixin); haloperidol decanoate (Haldol); aripiprazole monohydrate (Abilify Maintena); aripiprazole lauroxil (Aristada, Aristada Initio); olanzapine pamoate (Zyprexa Relprevv); paliperidone palmitate (Invega Sustenna, Invega Trinza, Invega Hafyera); risperidone (Risperdal Consta, RBP-7000 aka Perseris).
- Demographic covariates include age, sex, plan type, race/ethnicity, index year, region, SES.
- Health conditions include psychiatric and non-psychiatric comorbidities.
- HCRU includes all-cause and mental-health related medical and pharmacy utilization and costs.

Supplementary Figure 2: Sample selection


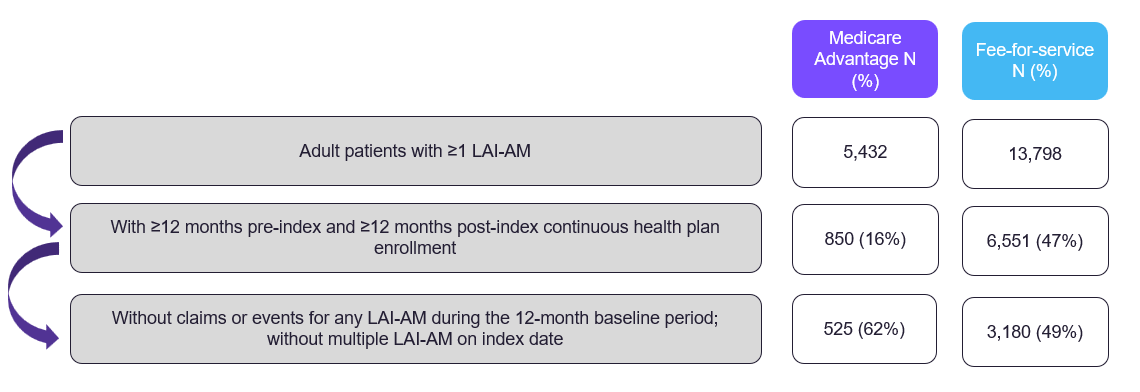


Supplementary Methods 1

**Social and health equity data**

Area-level data on socioeconomic status (economic stability, education access and quality) and neighborhood/built environment were derived from the American Community Survey (ACS) via 9-digit zip code linkage. The US Census Bureau administers the ACS annually, collecting information from approximately 2.0 to 2.5 million randomly sampled households per year, and its data are publicly available. ACS indicators represent five-year averages at the Census block group level; specifically, the 2020 ACS data are averages of the 2016-2020 annual estimates. More information can be found here: <https://www.census.gov/programs-surveys/acs/data.html>

Area-level data on urbanization for the MA cohort were generated by linking the member’s county of residence to the 2013 National Center for Health Statistics (NCHS) urban-rural classification scheme for counties and county-equivalent entities. The 2013 NCHS Urban-rural classification is the most recently updated scheme as of the point of data analysis of this study (Q2 2024). It is based on the Office of Management and Budget’s (OMB) delineation of metropolitan statistical areas (MSA) and micropolitan statistical areas (MISA). More information can be found here: <https://www.cdc.gov/nchs/data_access/urban_rural.htm>.

Details regarding the algorithms used to derive race/ethnicity in the HIRD and Medicare data have been previously published:

*For the HIRD –* Price A, Chi W, Overhage JM. Implementation and Validation of a Prioritization Logic to Identify the Best Available Race/Ethnicity Information for Members in Commercial Plans. Poster presentation at the 2024 ISPOR Annual Meeting in Atlanta, GA. Available at <https://www.ispor.org/heor-resources/presentations-database/presentation/intl2024-3898/139634>

*For Medicare –* Jarrín OF, Nyandege AN, Grafova IB, Dong X, Lin H. Validity of Race and Ethnicity Codes in Medicare Administrative Data Compared With Gold-standard Self-reported Race Collected During Routine Home Health Care Visits. Med Care. 2020 Jan;58(1):e1-e8.

**Definition of costs from pharmacy claims (FFS):**

Patient paid: Patient Pay Amount

Plan paid: Low-Income Cost-Sharing Subsidy (LICS) Amount + Other True Out-of-Pocket (Troop) Amount + Patient Liability Reduction due to Other Payer (PLRO) Amount + Covered D Plan Paid Amount + Non-Covered Plan Paid Amount

**Definition of costs from medical claims (FFS):**

Patient paid: Beneficiary Payment

Plan paid: Medicare Payment

Reference: Analytic Guidance - Chronic Conditions Data Warehouse. Chronic Conditions Data Warehouse. Published 2024. Accessed December 6, 2024. <https://www2.ccwdata.org/web/guest/analytic-guidance>

**List of LAI-AMs**

| **Generic name (brand)** | **First US approval** | **Admin frequency (maintenance)** | **HCPCS codes** | **Imputed days’ supply** | **Admin type** |
| --- | --- | --- | --- | --- | --- |
| *First generation (typical) LAIs* | |  | |  |  |
| Fluphenazine decanoate (Prolixin Decanoate) | N/A | Every 2 or 4 weeks | J2680 | 28 days | IM, SC |
| Haloperidol decanoate (Haldol Decanoate) | N/A | Every 4 weeks | J1631 | 28 days | IM |
| *Second generation (atypical) LAIs* | |  | |  |  |
| Aripiprazole monohydrate (Abilify Maintena) | 2002 | Every 4 weeks | J0401 | 28 days | IM |
| Aripiprazole lauroxil (Aristada, Aristada Initio for 1st dose) | 2015 | Every 4, 6, or 8 weeks | J1942, J1943, J1944, C9035, C9470 | 28 days (441 & 662mg)  42 days (882mg)  56 days (1064mg) | IM |
| Olanzapine pamoate (Zyprexa Relprevv) | 1996 | Every 2 or 4 weeks | J2358 | 14 days (150 & 210mg)  28 days (300 & 405mg) | IM |
| Paliperidone palmitate (Invega Sustenna, Invega Trinza, Invega Hafyera) | 2009, 2015, 2021 | Every 4 weeks (Sustenna)  Every 12 weeks (Trinza)  Every 6 months (Hafyera) | J2426, J2427, C9255 | 28 days (Sustenna), 84 days (Trinza), 180 days (Hafyera) | IM |
| Risperidone (Risperdal Consta, RBP-7000 aka Perseris) | 2003, 2018 | Every 2 weeks (Consta)  Every 4 weeks (Perseris) | J2794 , J2798, C9037 | 14 days (Consta), 28 days (Perseris) | IM (Consta),  SC (Perseris) |

IM, intramuscular; N/A, not available; SC, subcutaneous. All drugs are indicated only for schizophrenia or schizoaffective disorder, with the exception of Risperdal Consta, which is also indicated for bipolar 1 disorder. In 2023, three new formulations were FDA-approved [Uzedy (risperidone) Extended-Release Injectable Suspension administered every 4-8 weeks; Rykindo, a long-lasting injectable form of risperidone; and ABILIFY ASIMTUFII® (aripiprazole) administered every 8 weeks]. No data were available for these drugs during the 2016 to 2021 study period, so they were not included in this study.

**Accounting for differences in labeled administration frequency**

For each LAI-AM, we constructed a continuous treatment segment using days’ supply information, taken directly from available pharmacy claims or imputed in the case of medical claims. For example, for paliperidone, the possible imputed days’ supply values were 28 days (Invega Sustenna®), 84 days (Invega Trinza®), and 180 days (Invega Hafyera®). After the end of a continuous treatment segment, plus the 45-day grace period, a patient was flagged as non-persistent. This definition therefore accounts for variations in the administration frequency of the different formulations of paliperidone. The same approach was used for the other LAI-AMs.

**Sensitivity Analysis Results**

To determine if the loss of sample due to non-continuous enrollment and prior LAI-AM use altered the distribution of demographic and clinical characteristics and LAI-AM utilization, we removed the criteria for continuous enrollment and no prior LAI-AM use. This resulted in a MA cohort that was younger, with a higher proportion of males, and more D-SNP (Dual-Eligible Special Needs Plans) members enrolled. This cohort also was more racially diverse compared to the cohort with the continuous enrollment and prior LAI-AM restrictions. Similarly, the FFS cohort in our sensitivity analysis was slightly older, with a larger proportion having OASI (Old-Age and Survivors Insurance) entitlement, and more racially diverse. In terms of LAI utilization, individuals in the larger MA sample were more likely to initiate typical antipsychotic LAIs. A similar pattern was observed in the expanded FFS sample.

Supplementary Table 7: Selected demographic and baseline characteristics comparing main analytic population to expanded sensitivity analysis population

|  | **Medicare Advantage** | | **Fee-for-service** | |
| --- | --- | --- | --- | --- |
| **Characteristic** | **Main analysis** | **Sensitivity analysis** | **Main analysis** | **Sensitivity analysis** |
| Number of patients, N | 525 | 5,342 | 3,180 | 13,798 |
| **Sex, n (%) male** | 235 (44.8%) | 2,844 (53.2%) | 1,783 (56.1%) | 7981 (57.8%) |
| **Age on index date, years** |  |  |  |  |
| Mean (SD) | 53.8 (15.08) | 50.4 (13.5) | 48.6 (15.3%) | 49.7 (15.8%) |
| **US geographic region of patient residence, n (%)** |  |  |  |  |
| Midwest | 304 (57.9%) | 2,859 (53.5%) | 756 (23.8%) | 3535 (25.6%) |
| Northeast | 117 (22.3%) | 936 (17.5%) | 539 (16.9%) | 2514 (18.2%) |
| South | 86 (16.4%) | 1,358 (25.4%) | 1,239 (39.0%) | 5111 (37.0%) |
| West | 18 (3.4%) | 189 (3.5%) | 644 (20.3%) | 2549 (18.5%) |
| **MA D-SNP enrollment status of beneficiaries, n (%)** |  |  |  |  |
| D-SNP (includes dual eligible beneficiaries only) | 243 (47.2%) | 3,464 (64.8%) | N/A | N/A |
| Non D-SNP (includes duals and non-dual beneficiaries) | 282 (52.8%) | 1,878 (35.2%) | N/A | N/A |
| **FFS dual eligibility status of beneficiaries, n (%)** |  |  |  |  |
| No duals | N/A | N/A | 407 (12.8%) | 2150 (15.6%) |
| Partial duals | N/A | N/A | 464 (14.6%) | 1884 (13.7%) |
| Full duals | N/A | N/A | 2,309 (72.6%) | 9764 (70.8%) |
| **Medicare enrollment reason, n (%)** |  |  |  |  |
| Old age and survivor’s insurance (OASI) | N/A | N/A | 537 (16.9%) | 2867 (20.8%) |
| Disability insurance benefits (DIB) | N/A | N/A | 2,640 (83.0%) | 10919 (79.1%) |
| End-stage renal disease (ESRD) | N/A | N/A | <11 | < 11 |
| Both DIB and ESRD | N/A | N/A | <11 | <11 |
| **Year of index date, n (%)** |  |  |  |  |
| 2017 | 104 (19.8%) | 1,467 (27.5%) | 1,279 (40.2%) | 8130 (58.9%) |
| 2018 | 113 (21.5%) | 838 (15.7%) | 819 (25.8%) | 2136 (15.5%) |
| 2019 | 149 (28.4%) | 1,261 (23.6%) | 636 (20.0%) | 1950 (14.1%) |
| 2020 | 159 (30.3%) | 1,776 (33.2%) | 446 (14.0%) | 1582 (11.5%) |
| **Race/ethnicity, n (%)** |  |  |  |  |
| Patients with race/ethnicity data available | 478 (91.0%) | 4,513 (84.5%) | 3,180 (100%) | 13,798 (100%) |
| White, Not Hispanic or Latino | 313 (65.5%) | 2,519 (55.8%) | 1,885 (59.3%) | 7375 (53.5%) |
| Black or African American, Not  Hispanic or Latino | 122 (25.5%) | 1,587 (35.2%) | 831 (26.1%) | 4143 (30.0%) |
| Hispanic or Latino of any race | 28 (5.9%) | 307 (6.8%) | 283 (8.9%) | 1436 (10.4%) |
| Asian, Not Hispanic or Latino | 10 (2.1%) | 64 (1.4%) | 66 (2.1%) | 340 (2.5%) |
| American Indian or Alaska Native,  Not Hispanic or Latino | <11 | 23 (0.5%) | 36 (1.1%) | 138 (1.0%) |
| Native Hawaiian or Other Pacific  Islander, Not Hispanic or Latino | 0 (0.0%) | <11 | 21 (0.7%) | 81 (0.6%) |
| Other race, Not Hispanic or Latino | <11 | 12 (0.3%) | 58 (1.8%) | 285 (2.1%) |
| Diversity index | 50.21% | 55.99% | 57.1% | 61.2% |
| **Index LAI antipsychotic medication, n (%)** |  |  |  |  |
| Typical antipsychotics | 118 (22.5%) | 1,451 (27.2%) | 867 (27.3%) | 4211 (30.5%) |
| Atypical antipsychotics | 407 (77.5%) | 3,895 (72.9%) | 2,313 (72.7%) | 9587 (69.5%) |
| **Index LAI antipsychotic drug type, n (%)** |  |  |  |  |
| Branded | 371 (70.7%) | 3,758 (70.3%) | 2,173 (68.3%) | 9205 (66.7%) |
| Generic | 113 (21.5%) | 1,399 (26.2%) | 730 (23.0%) | 3557 (25.8%) |
| Unknown | 41 (7.8%) | 185 (3.5%) | 277 (8.7%) | 1036 (7.5%) |
| **Index LAI antipsychotic provider, n (%)** |  |  |  |  |
| Psychiatrist/Psychologist | 232 (44.2%) | 2,602 (48.7%) | 1,596 (50.2%) | 7,168 (51.9%) |
| PCP | 57 (10.8%) | 281 (5.3%) | 345 (10.9%) | 1562 (11.3%) |
| Other clinicians | 158 (30.0%) | 1,727 (32.3%) | 1,086 (34.2%) | 4352 (31.5%) |
| Missing/Unknown | 78 (14.8%) | 732 (13.7%) | 153 (4.8%) | 716 (5.2%) |
| **Index LAI antipsychotic location/administration, n (%)** |  |  |  |  |
| Inpatient | 21 (4.0%) | 60 (1.1%) | <11 | 23 (0.2) |
| Emergency | 12 (2.3%) | 56 (1.0%) | 0 | 0 |
| Outpatient | 32 (6.1%) | 263 (4.9%) | 271 (8.5%) | 970 (7.0) |
| Pharmacy | 464 (87.7%) | 4,980 (92.9%) | 2,904 (91.3%) | 12804 (92.8) |
| Both medical and pharmacy | <11 | 17 (0.3%) | 0 | 0 |
